# Supplementary material for: Spatially confined synthesis of a flexible and hierarchically porous three-dimensional graphene/FeP hollow nanosphere composite anode for highly efficient and ultrastable potassium ion storage
Source: Royal Society of Chemistry journal article supplement (doi:10.1039/c9ta12191a), 2020-01-01
Supplement: c9ta12191a1.pdf [file c9ta12191a1.pdf]

## Supporting Information

### Spatially Confined Synthesis of Flexible and Hierarchically Porous Three Dimensional Graphene/FeP Hollow Nanospheres Composite Anode for Highly Efficient and Ultrastable Potassium Ion Storage

Zhifang Zhang,<sup>a</sup> Chenxiao Wu,<sup>a</sup> Zhonghui Chen,<sup>b,\*</sup> Huiyu Li,<sup>a</sup> Haijing Cao,<sup>a</sup> Xiaojing Luo,<sup>a</sup> Zebo Fang,<sup>c</sup> and Yanyan Zhu<sup>a,\*</sup>

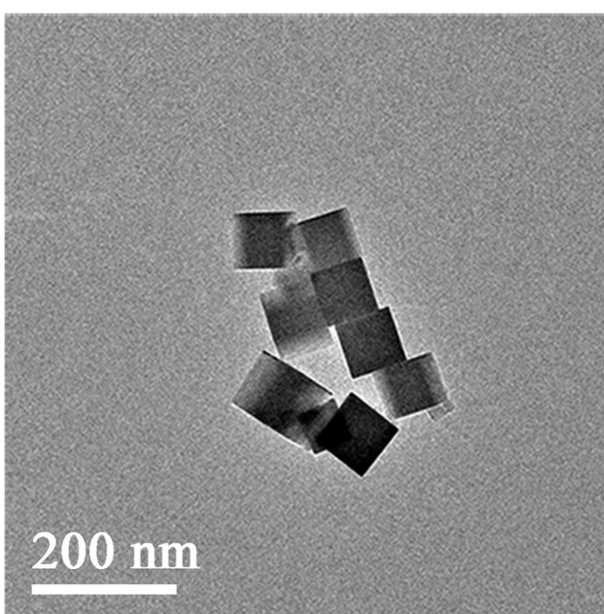

**Fig. S1.** Pure PB synthesized in the absence of GO under the same procedure as the GO/PB composites.

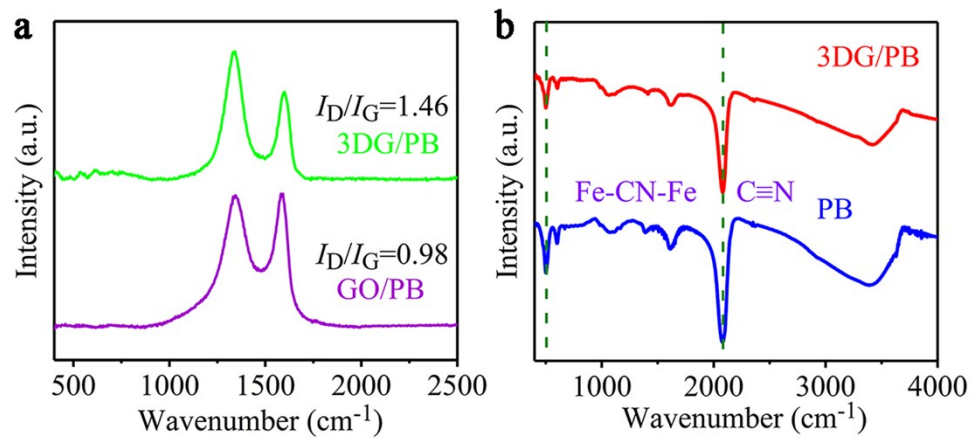

**Fig. S2.** (a) Raman spectra of GO/PB and 3DG/PB. (b) FTIR spectra of PB and 3DG/PB.

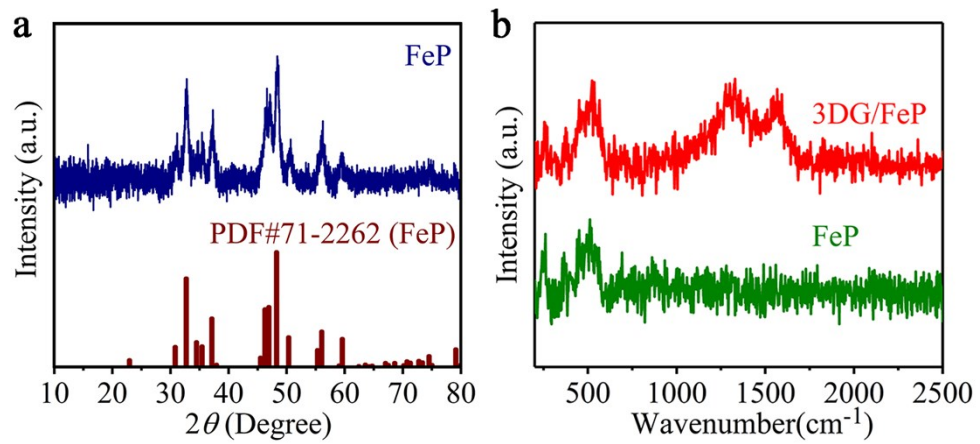

Fig. S3. The XRD pattern of (a) FeP, (b)3DG/FeP and FeP.

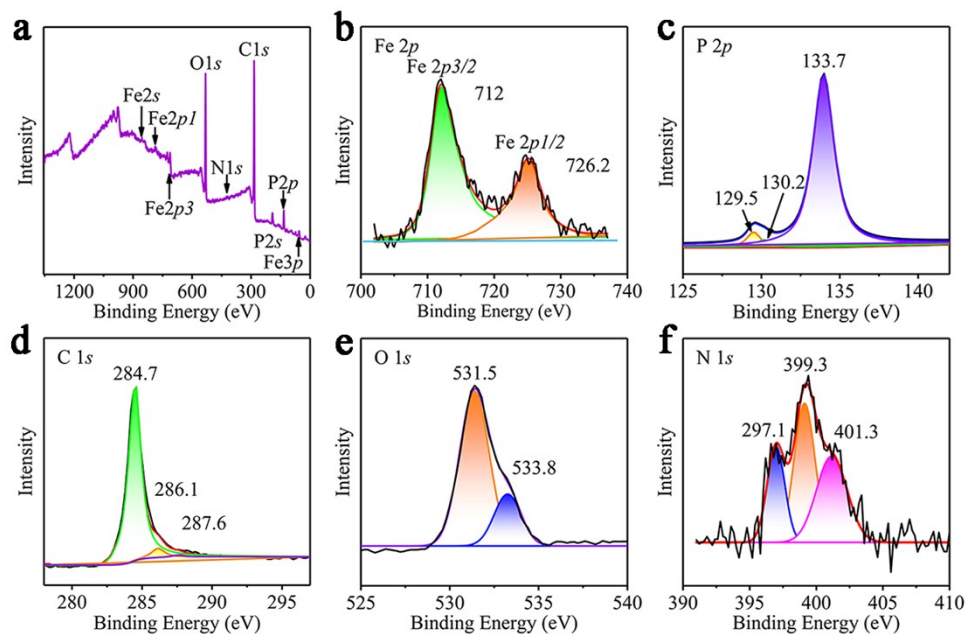

**Fig. S4.** (a) XPS survey spectrum, (b) Fe 2p, (c) P 2p, (d) C 1s, (e) O 1s and (f) N 1s spectra of the 3DG/FeP.

In the XPS survey spectrum of the 3DG/FeP, the elements of Fe, N, C, P could be detected, which indicated the successful phosphorization of 3DG/PB (Fig. S2a). Peaks at 712 and 726.2 eV corresponds to the Fe 2p, and peaks located at 129.5 and 130.2 eV are assigned to P 2p<sub>1/2</sub> and P 2p<sub>3/2</sub> of P-Fe respectively (Fig. S2b and c). Furthermore, the P 2p peaks at 133.4 eV can be related to the P=O. The peaks at 284.7, 286.1, and 287.6 eV of C 1s show the existence of C-C (sp<sup>2</sup> C), C-N, and C=O bonds, respectively (Fig. S2d and e). The high intensity C-C peak indicates that the GO has been well reduced to rGO. In addition, N signals (397.1, 399.3, and 401.3 eV) are also observed for 3DG/FeP (Figure S2f), which comes from the -C≡N- in PB.

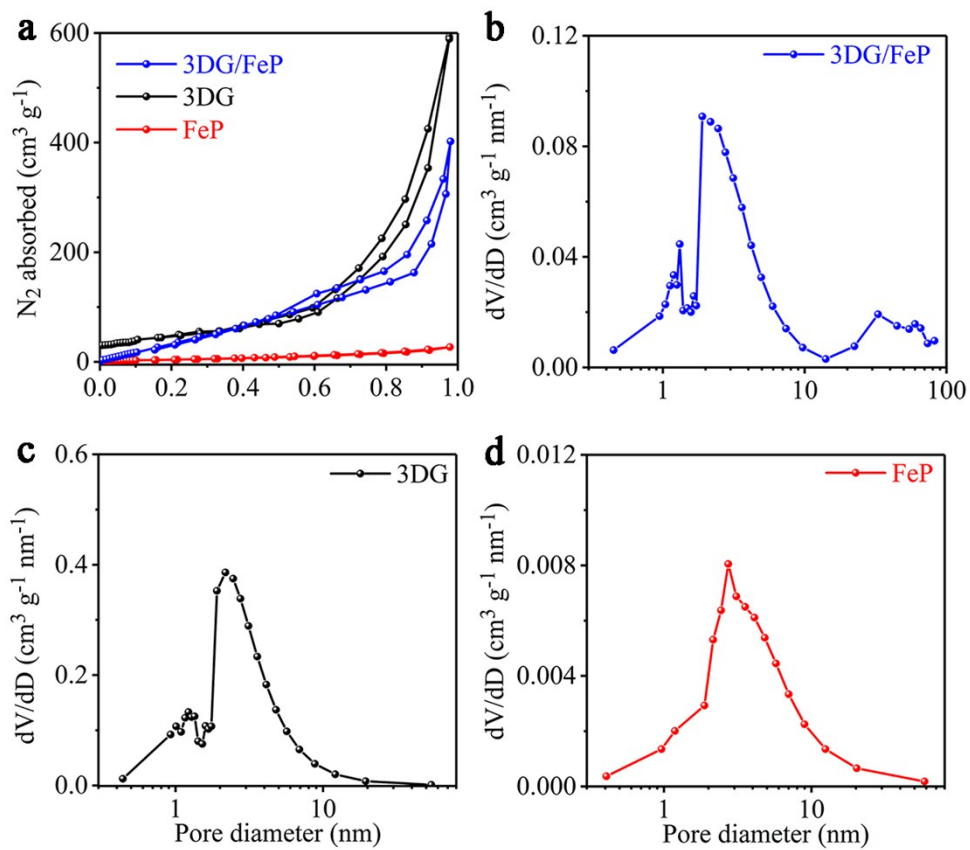

**Fig. S5.** (a) The  $N_2$  adsorption-desorption isotherms, the pore-size distribution of (b) 3DG/FeP, (c) 3DG, and (d) FeP.

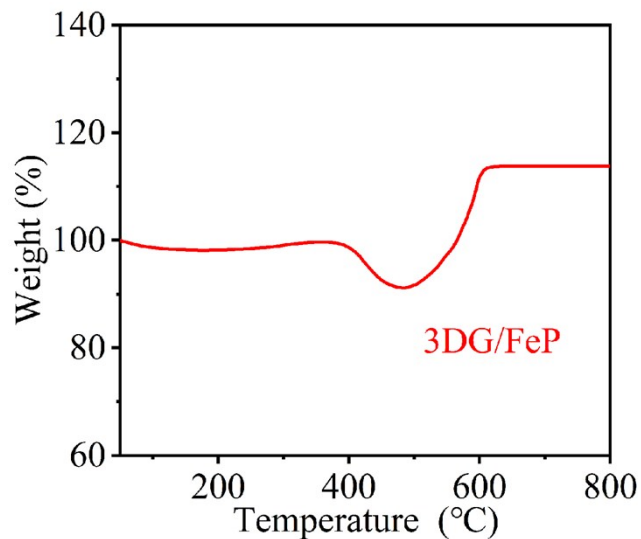

**Fig. S6.** The TGA curve of 3DG/FeP in air at a heating rate of 10 °C min<sup>-1</sup>.

FeP content was measured in detail according to the calculation method of the reported carbon-based FeP.<sup>S1</sup> The weight content of FeP in samples were estimated as follows:

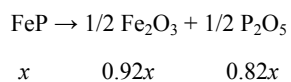

Assuming the FeP content is  $x$ , the weight fractions for FeP was calculated as the following formula:  $0.92x + 0.82x - (1-x) = 114\%$ . Therefore, the FeP content in the 3DG/FeP was about 78 %.

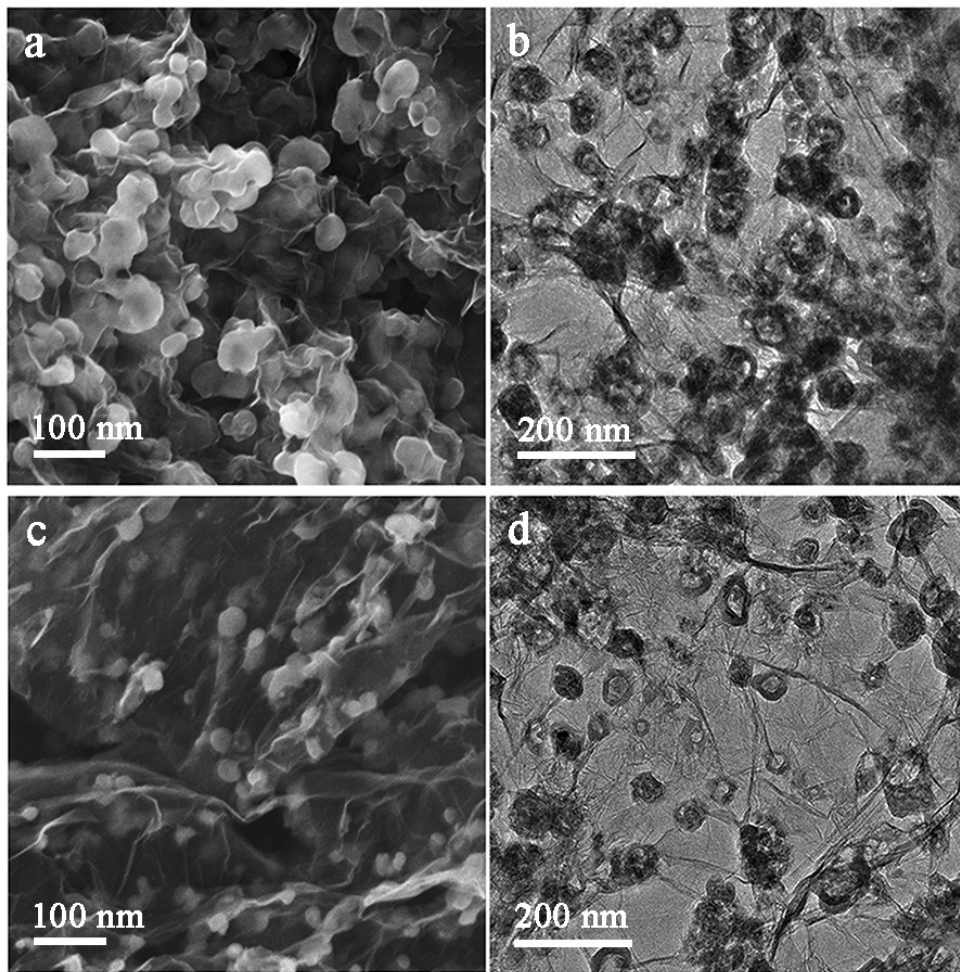

**Fig. S7.** SEM images of 3DG/FeP-H (a), 3DG/FeP-L (c). TEM images of 3DG/FeP-H (b), 3DG/FeP-L (d) (about 84% of FeP in 3DG/FeP-H and 68% of FeP in 3DG/FeP-L)

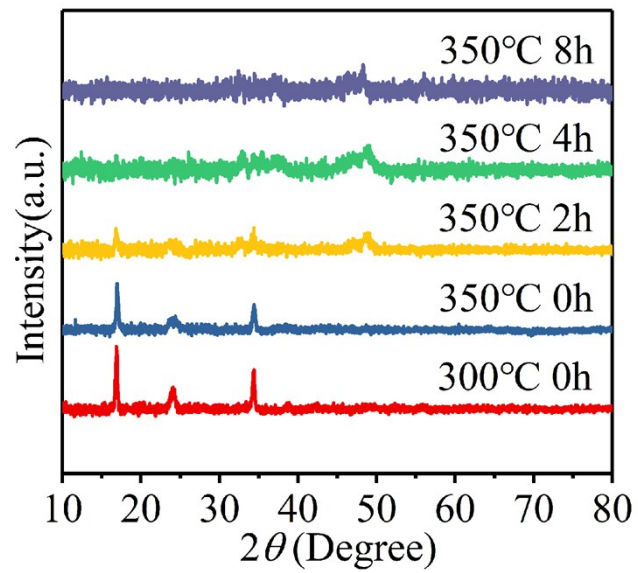

**Fig. S8.** XRD patterns of the obtained products collected at different reaction temperature for different reaction time, (a) 300 °C 0 h, (b) 350 °C 0 h, (c) 350 °C 2 h, (d) 350 °C 4 h, (e) 350 °C 8 h.



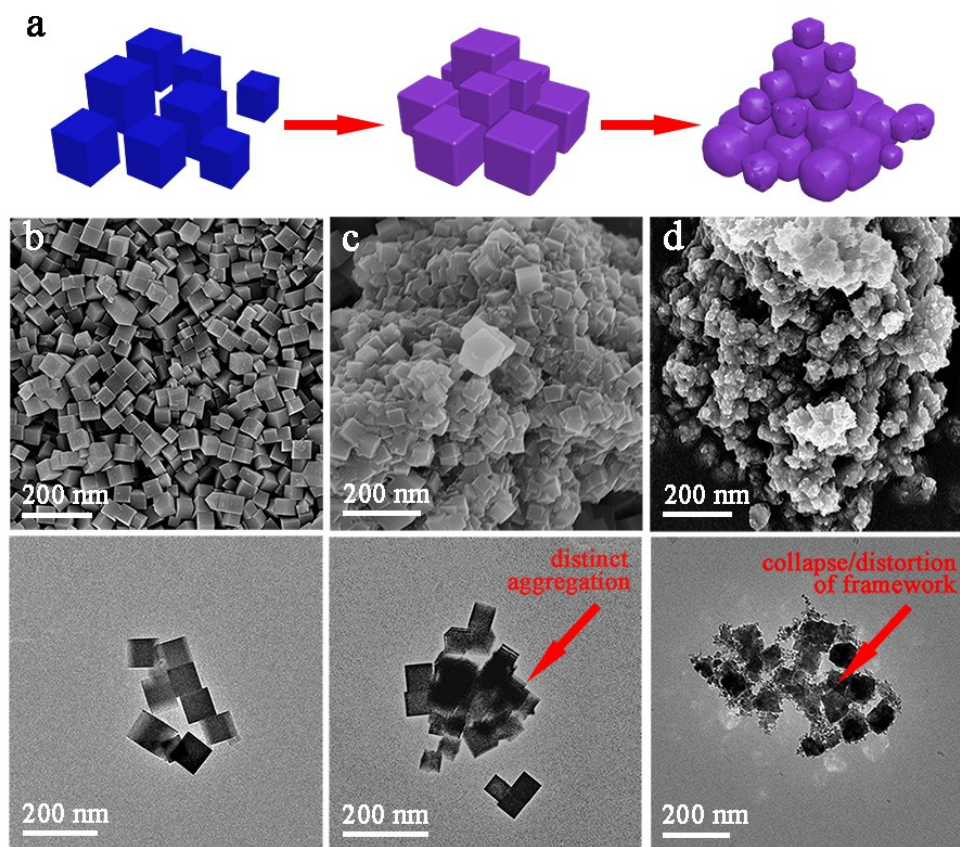

**Fig. S9.** (a) Thermal conversion diagram of PB. The SEM and TEM images of pure PB (b), FeP after 2 h (c) and 8h (d) thermal doping treatment.

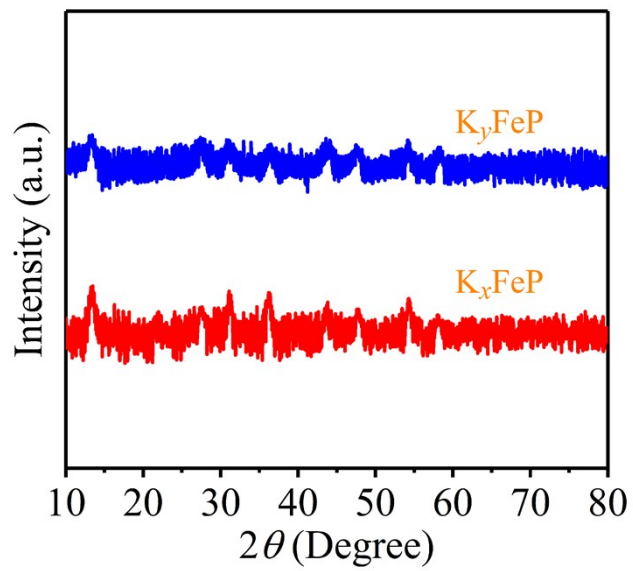

**Fig. S10.** XRD patterns of the  $K_x\text{FeP}$  (0.9 V) and  $K_y\text{FeP}$  (0.6 V) during the first discharge process.

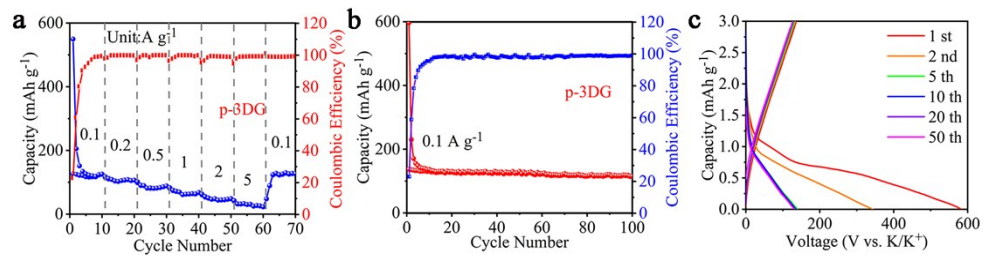

**Fig. S11.** (a) The rate performance (b) cycling performance of p-3DG anode at 0.1 A g<sup>-1</sup> for 100 cycles. (c) The charge/discharge curves of p-3DG at 0.1 A g<sup>-1</sup>.

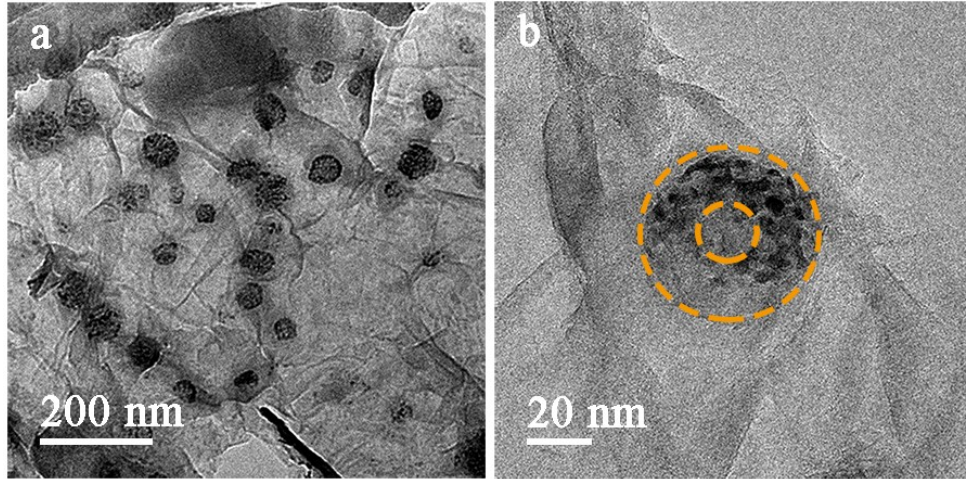

**Fig. S12.** The TEM images of 3DG/FeP anode after 200 cycles.

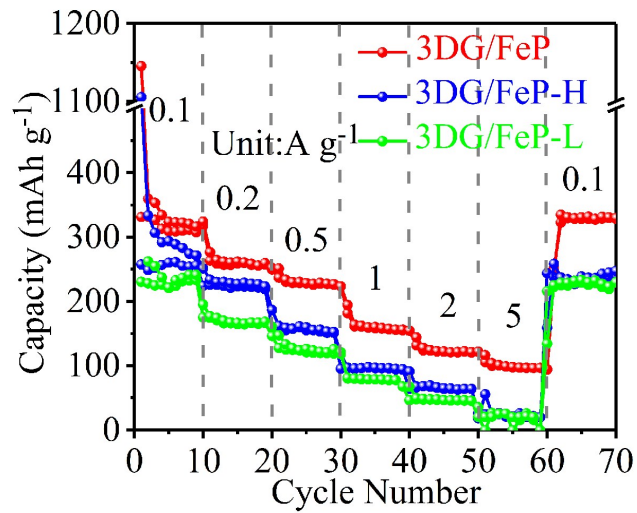

Fig. S13. The rate performance of 3DG/FeP with different mass content of FeP.

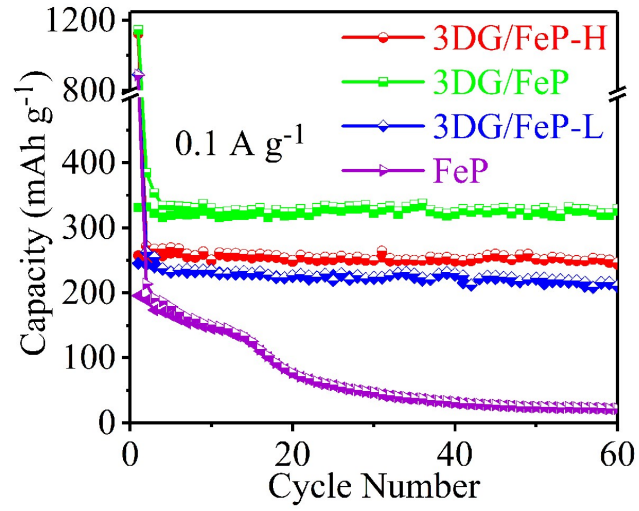

**Fig. S14.** The cycling performance of 3DG/FeP with different mass content of FeP and pure FeP at 0.1 A g<sup>-1</sup>.

**Table S1.** Comparison of recently reported typical FeP-based anode materials for potassium ion batteries.

| Materials                                                                | Ratio of Active Material | Current Density /mA g <sup>-1</sup> | Capacity /mAh g <sup>-1</sup> | Capacity (By Electrode) /mAh g <sup>-1</sup> | Cycle Life /Capacity Retention @Cycle Number@mA g <sup>-1</sup>       | Ref |
|--------------------------------------------------------------------------|--------------------------|-------------------------------------|-------------------------------|----------------------------------------------|-----------------------------------------------------------------------|-----|
| CoP/C                                                                    | 80%                      | 50                                  | 126.72                        | 101.4                                        | ~75%@200@200 mA g <sup>-1</sup>                                       | S2  |
|                                                                          |                          | 1000                                | 54.4                          | 43.52                                        |                                                                       |     |
| FeP@C                                                                    | 80%                      | 100                                 | 220                           | 176                                          | 92%@300@100 mA g <sup>-1</sup>                                        | S3  |
|                                                                          |                          | 2000                                | 40                            | 32                                           |                                                                       |     |
| ZnS@C@rGO                                                                | 90%                      | 50                                  | 320                           | 297                                          | ~25%@300@500 mA g <sup>-1</sup>                                       | S4  |
|                                                                          |                          | 500                                 | 240                           | 187.2                                        |                                                                       |     |
| MoS <sub>2</sub> /rGO                                                    | 80%                      | 100                                 | 380                           | 304                                          | 100@100 mA g <sup>-1</sup>                                            | S5  |
| MoSe <sub>2</sub> /N-C                                                   | 80%                      | 100                                 | 258                           | 206.4                                        | 88%@200@100 mA g <sup>-1</sup>                                        | S6  |
| Sn/C                                                                     | 80%                      | 25                                  | 150                           | 120                                          | 75%@30@25 mA g <sup>-1</sup>                                          | S7  |
| FeCl <sub>3</sub> -EG                                                    | 80%                      | 50                                  | 269.5                         | 215.6                                        | 88.82%@500@100 mA g <sup>-1</sup><br>70%@1300@5000 mA g <sup>-1</sup> | S8  |
| VS <sub>2</sub> /NSA                                                     | 60%                      | 1000                                | 175.4                         | 105.24                                       | 105%@100@1000 mA g <sup>-1</sup>                                      | S9  |
|                                                                          |                          | 5000                                | 133.1                         | 79.86                                        |                                                                       |     |
| K <sub>2</sub> Ti <sub>8</sub> O <sub>17</sub>                           | 70%                      | 100                                 | 400                           | 280                                          | 85%@50@20 mA g <sup>-1</sup>                                          | S10 |
|                                                                          |                          | 2000                                | 100                           | 70                                           |                                                                       |     |
| Hybrid Co <sub>3</sub> O <sub>4</sub> -Fe <sub>2</sub> O <sub>3</sub> /C | 66.6%                    | 20                                  | 120                           | 79.92                                        | 93%@180@50 mA g <sup>-1</sup>                                         | S11 |
|                                                                          |                          | 500                                 | 50                            | 33.3                                         |                                                                       |     |
| Ordered Mesoporous Carbon                                                | 80%                      | 50                                  | 257.4                         | 205.92                                       | 99%@20@50 mA g <sup>-1</sup>                                          | S12 |
|                                                                          |                          | 1000                                | 146.5                         | 117.2                                        |                                                                       |     |
| Soft Carbon                                                              | 70%                      | 500                                 | 200                           | 140                                          | 71.4%@1000@350 mA g <sup>-1</sup>                                     | S13 |
| Oak-based Hard Carbon                                                    | 80%                      | 100                                 | 135                           | 108                                          | 98%@150@100 mA g <sup>-1</sup>                                        | S14 |
| Semi-hollow Micro Soft Carbon                                            | 70%                      | 100                                 | 312                           | 218.4                                        | 82%@500@200 mA g <sup>-1</sup>                                        | S15 |
|                                                                          |                          | 500                                 | 180                           | 126                                          |                                                                       |     |

|                              |      |       |         |        |                                    |     |
|------------------------------|------|-------|---------|--------|------------------------------------|-----|
| Hard-soft Composite Carbon   | 80%  | 100   | 261     | 208.8  | 93%@450@200 mA g <sup>-1</sup>     | S16 |
|                              |      | 10000 | 120     | 96     |                                    |     |
| Graphitic Carbon Networks    | 80%  | 100   | 220     | 176    | 75%@500@50 mA g <sup>-1</sup>      | S17 |
|                              |      | 2000  | 100     | 80     |                                    |     |
| Graphite                     | 90%  | 20    | 246     | 221.4  | 98%@200@20 mA g <sup>-1</sup>      | S18 |
|                              |      | 500   | ~0      | ~0     |                                    |     |
| Reduced Graphene Oxide       | 80%  | 5     | 280/205 | 224    | 100%@175@10 mA g <sup>-1</sup>     | S19 |
|                              |      | 100   | 50      | 40     |                                    |     |
| FFGF (F-Doped Graphene Foam) | 70%  | 50    | 326.1   | 228.27 | 90.91%@50@60 mA g <sup>-1</sup>    | S20 |
|                              |      | 500   | 165.9   | 116.13 | 88.24%@500@500 mA g <sup>-1</sup>  |     |
| N-doped Graphene             | 100% | 50    | 350     | 350    | 77.78%@100@100 mA g <sup>-1</sup>  | S21 |
| <b>This Work</b>             | 100% | 100   | 323     | 323    | 97.3%@300@100 mA g <sup>-1</sup>   |     |
|                              |      | 2000  | 127     | 127    | 97.6%@2000@2000 mA g <sup>-1</sup> |     |

## References

- S1 Q. Wang, B. Wang, Z. Zhang, Y. Zhang, J. Peng, Y. Zhang and H. Wu, *Inorg. Chem. Front.*, 2018, **5**, 2605-2614.
- S2 J. Bai, B. Xi, H. Mao, Y. Lin, X. Ma, J. Feng and S. Xiong, *Adv. Mater.*, 2018, **30**, 1802310-1802317.
- S3 F. Yang, H. Gao, J. Hao, S. Zhang, P. Li, Y. Liu, J. Chen and Z. Guo, *Adv. Funct. Mater.*, 2019, **29**, 1808291-1808298.
- S4 J. Chu, W. Wang, J. Feng, C.-Y. Lao, K. Xi, L. Xing, K. Han, Q. Li, L. Song and P. Li, *ACS Nano*, 2019, **13**, 6906-6916.
- S5 K. Xie, K. Yuan, X. Li, W. Lu, C. Shen, C. Liang, R. Vajtai, P. Ajayan and B. Wei, *Small*, 2017, **13**, 1701471-1701479.
- S6 J. Ge, L. Fan, J. Wang, Q. Zhang, Z. Liu, E. Zhang, Q. Liu, X. Yu, and B. Lu, *Adv. Energy Mater.*, **2018**, **8**, 1801477-1801484.
- S7 I. Sultana, T. Ramireddy, M. M. Rahman, Y. Chen and A. M. Glushenkov, *Chem. Commun.*, 2016, **52**, 9279-9282.
- S8 D. Li, M. Zhu, L. Chen, L. Chen, W. Zhai, Q. Ai, G. Hou, Q. Sun, Y. Liu, and Z. Liang, *Adv. Mater. Inter.*, 2018, **5**, 1800606-1800615.
- S9 J. Zhou, L. Wang, M. Yang, J. Wu, F. Chen, W. Huang, N. Han, H. Ye, F. Zhao and Y. Li, *Adv. Mater.*, 2017, **29**, 1702061-1702069.
- S10 J. Han, M. Xu, Y. Niu, G.-N. Li, M. Wang, Y. Zhang, M. Jia, C. M. Li, *Chem. Commun.*, 2016, **52**, 11274-11276.
- S11 I. Sultana, M. M. Rahman, S. Mateti, V. G. Ahmadabadi, A. M. Glushenkov and Y. Chen, *Nanoscale*, 2017, **9**, 3646-3654.
- S12 W. Wang, J. Zhou, Z. Wang, L. Zhao, P. Li, Y. Yang, C. Yang, *Adv. Energy Mater.*, 2018, **8**, 1701648-1701656.
- S13 L. Fan, K. Lin, J. Wang, R. Ma, B. Lu, *Adv. Mater.*, 2018, **30**, 1800804-1800811.
- S14 S. R. Prabakar, S. C. Han, C. Park, I. A. Bhairuba, M. J. Reece, K.-S. Sohn and M. Pyo, *J. Electrochem. Soc.*, 2017, **164**, A2012-A2016.
- S15 X. Wang, K. Han, D. Qin, Q. Li, C. Wang, C. Niu, L. Mai, *Nanoscale*, 2017, **9**, 18216-18222.
- S16 Z. Jian, S. Hwang, Z. Li, A. S. Hernandez, X. Wang, Z. Xing, D. Su, and X. Ji, *Adv. Funct. Mater.*, 2017, **27**, 1700324-1700330.
- S17 W. Zhang, X. Jiang, X. Wang, Y. V. Kaneti, Y. Chen, J. Liu, J. S. Jiang, Y. Yamauchi and M. Hu, *Angew. Chem. Int. Ed.*,



2017, **56**, 8435-8440.

S18 J. Zhao, X. Zou, Y. Zhu, Y. Xu and C. Wang, *Adv. Funct. Mater.*, 2016, **26**, 8103-8110.

S19 W. Luo, J. Wan, B. Ozdemir, W. Bao, Y. Chen, J. Dai, H. Lin, Y. Xu, F. Gu and V. Barone, *Nano Lett.*, 2015, **15**, 7671-7677.

S20 Z. Ju, S. Zhang, Z. Xing, Q. Zhuang, Y. Qiang and Y. Qian, *ACS Appl. Mater. Inter.*, 2016, **8**, 20682-20690.

S21 K. Share, A. P. Cohn, R. Carter, B. Rogers, C. L. Pint, *ACS Nano*, 2016, **10**, 9738-9744.
